# Supplementary material for: RASSF1A controls tissue stiffness and cancer stem‐like cells in lung adenocarcinoma
Source: PubMed Central journal article supplement (PMC6600643; doi:10.15252/embj.2018100532), 2019-05-27

**Figure 6C**

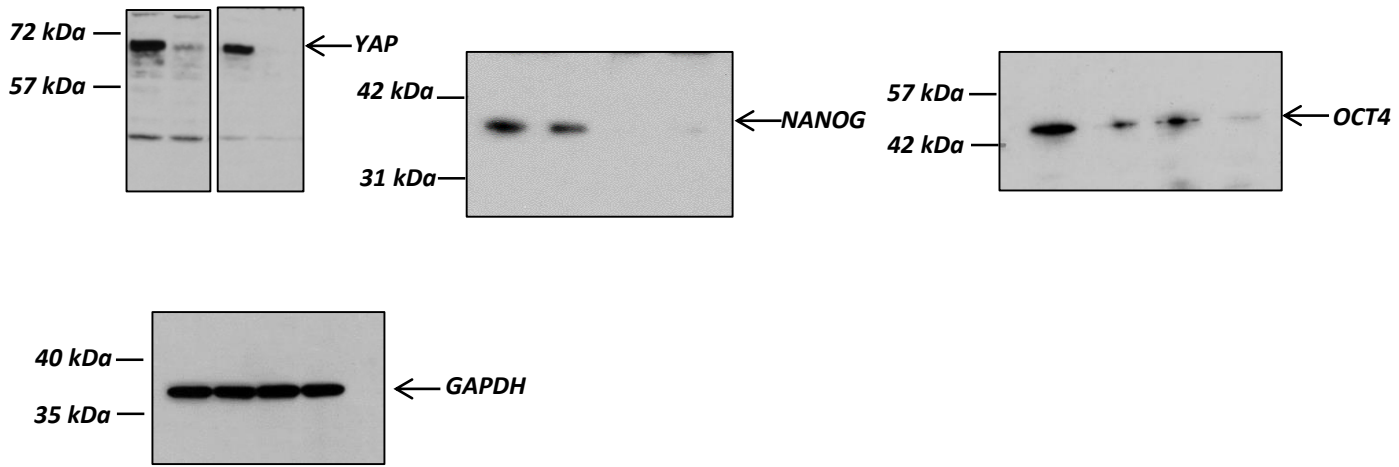

**Figure 6F**

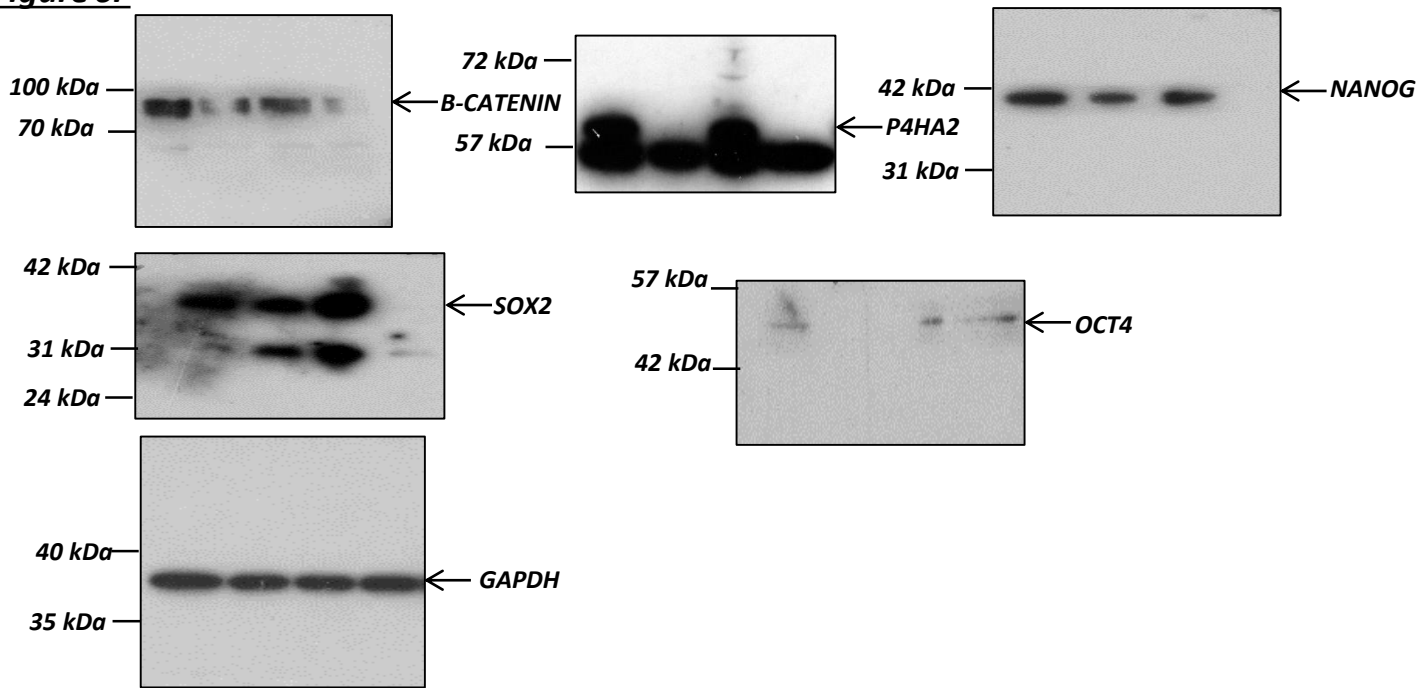

Supplement: EMBJ-38-e100532-s009.pdf [file EMBJ-38-e100532-s009.pdf]
